# Supplementary material for: Structural Determinants of Unique Properties of Human IgG4-Fc
Source: PubMed Central journal article supplement (PMC3905167; doi:10.1016/j.jmb.2013.10.039), 2014-02-06
Supplement: mmc1.pdf [file mmc1.pdf]

## SUPPLEMENTARY INFORMATION

**Fig. S1**

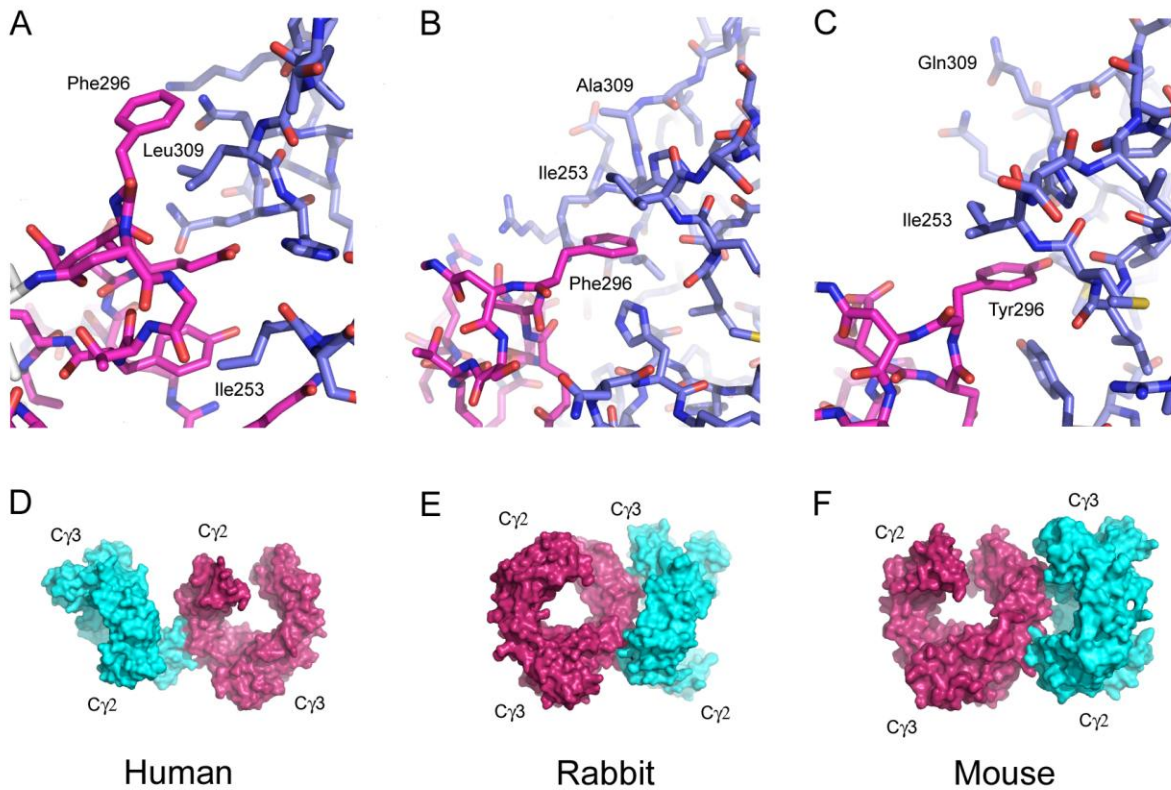

**Fig. S1.** Intermolecular interfaces involving residues 253 and 296 in human, rabbit and mouse IgG. (A) View of interface II identified in the human IgG4-Fc crystal structures. (B) View of an interface involving Ile253 and Phe296 in rabbit IgG (PDB ID [2VUO](#)). Unlike IgG4, residue 309 is an alanine and not involved in the interface. (C) View of an interface involving Ile253 and Tyr296 in mouse IgG2b (PDB ID [2RGS](#)). Unlike IgG4, residue 309 is a glutamine and not involved in the interface. (D) Orientation of two IgG4-Fc molecules interacting through interface II shown in (A). (E) Orientation of two rabbit IgG-Fc molecules interacting through the interface shown in (B). (F) Orientation of two mouse IgG2b-Fc molecules interacting through the interface shown in (C).

**Fig. S2**

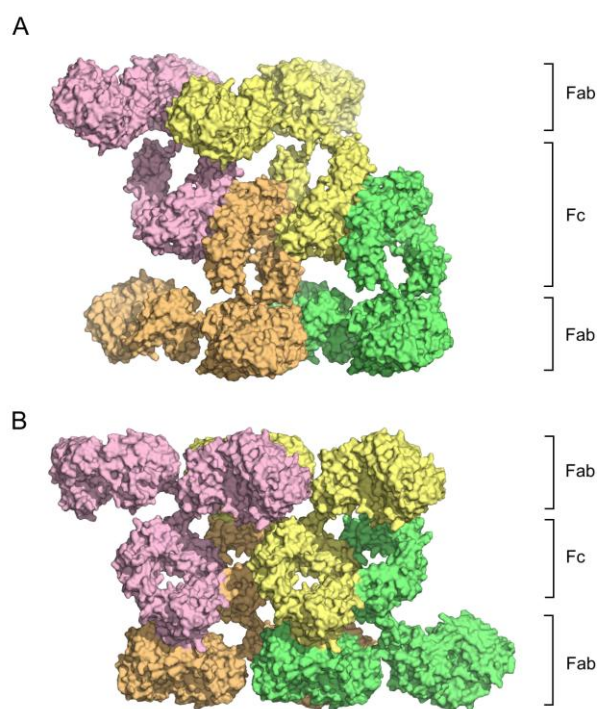

**Fig. S2.** Interfaces I and II can accommodate whole antibody structures. (A) An assembly utilising Interface I can be created using a whole antibody structure without any clashes between Fab and Fc components. (B) An assembly using Interface II can also be created with no clashes. The interaction is such that the top of the  $C_{H2}$  domain (site containing Phe296) from chain A of one antibody molecule interacts with the side (site containing Ile253 and Leu309) of chain B from the second antibody molecule. In both figures, four whole antibody molecules are shown and the template structure used is that of murine IgG2a (PDB ID [1IGT](#)).
